# Supplementary material for: Guided crystallization of P3HT in ternary blend solar cell based on P3HT:PCPDTBT:PCBM
Source: Royal Society of Chemistry journal article supplement (doi:10.1039/c4ee02004a), 2014-01-01
Supplement: c4ee02004a1.pdf [file c4ee02004a1.pdf]

## Supporting Information

### Guided Crystallization of P3HT in Ternary Blend Solar Cell Based on P3HT:PCPDTBT:PCBM

Yu Gu, Cheng Wang, Feng Liu, Jihua Chen, Ondrej E. Dyck, Gerd Duscher, Thomas P. Russell\*

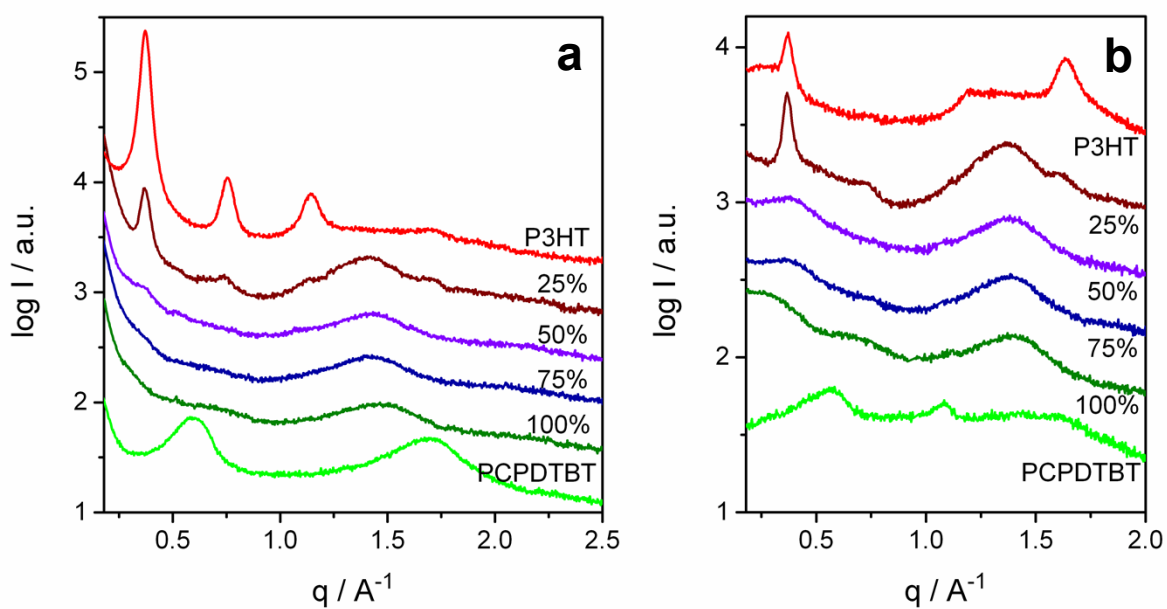

**Figure S1.** GIXD (a) OOP or (b) IP profiles for P3HT-32k:PCPDTBT:PC<sub>61</sub>BM ternary blend thin films with different PCPDTBT contents and pure P3HT or PCPDTBT films.

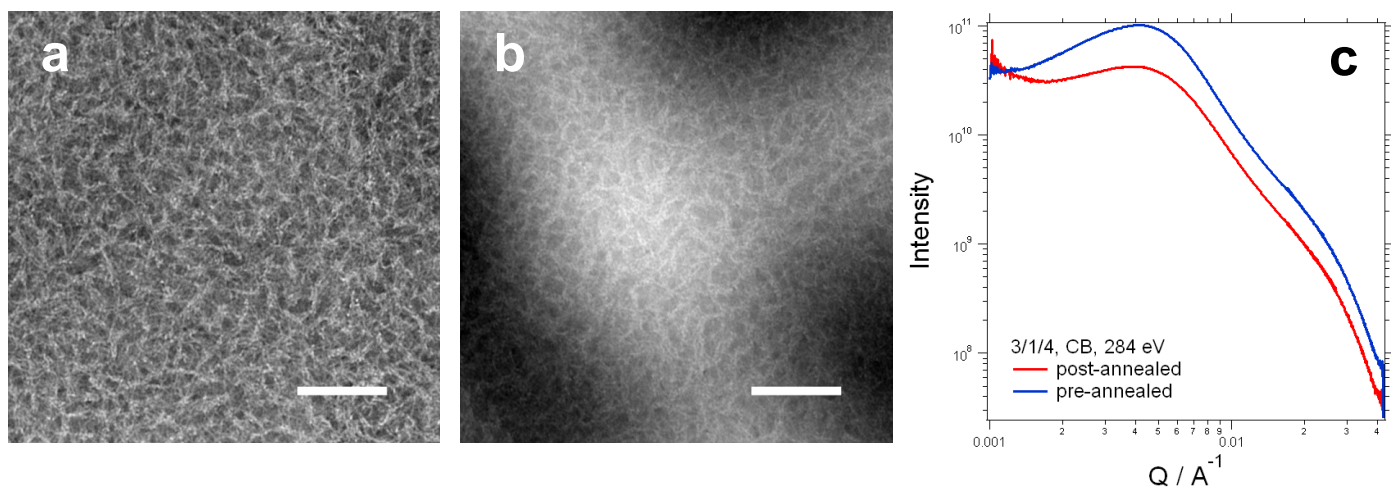

**Figure S2.** BF-TEM images for ternary blend thin films of P3HT-32k:PCPDTBT:PC<sub>61</sub>BM with weight ratio of 3/1/4 (25 wt% of PCPDTBT), spin-coated by CB, pre-annealed (a) or post-annealed (b). The scale bar is 500 nm. P-RSoXS profiles for the pre-annealed and post-annealed samples (c).

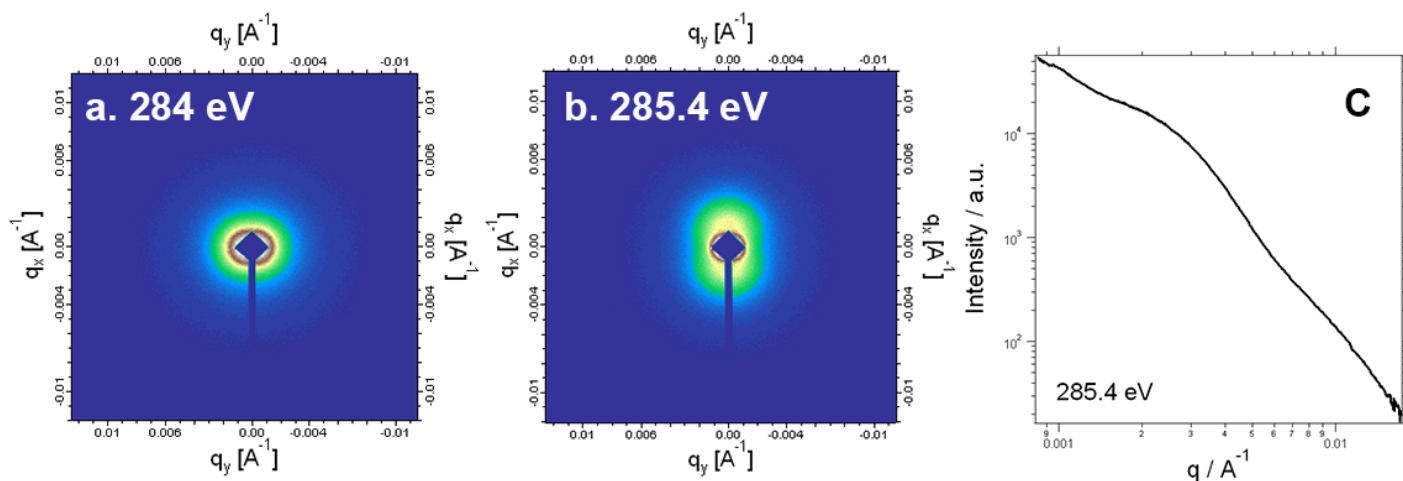

**Figure S3.** P-RSoXS patterns (a, b) and circularly averaged profile (c) for regio-random P3HT:PCPDTBT thin film (1/1 wt/wt, spin-coated by CB, pre-annealed at 150°C for 10 minutes) at horizontally polarized x-ray beam.

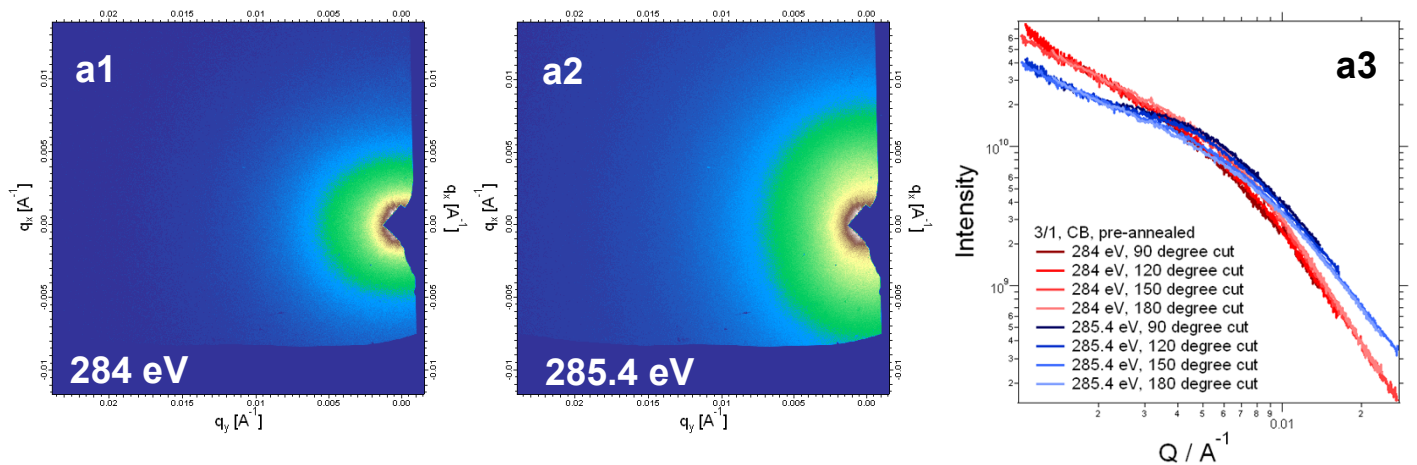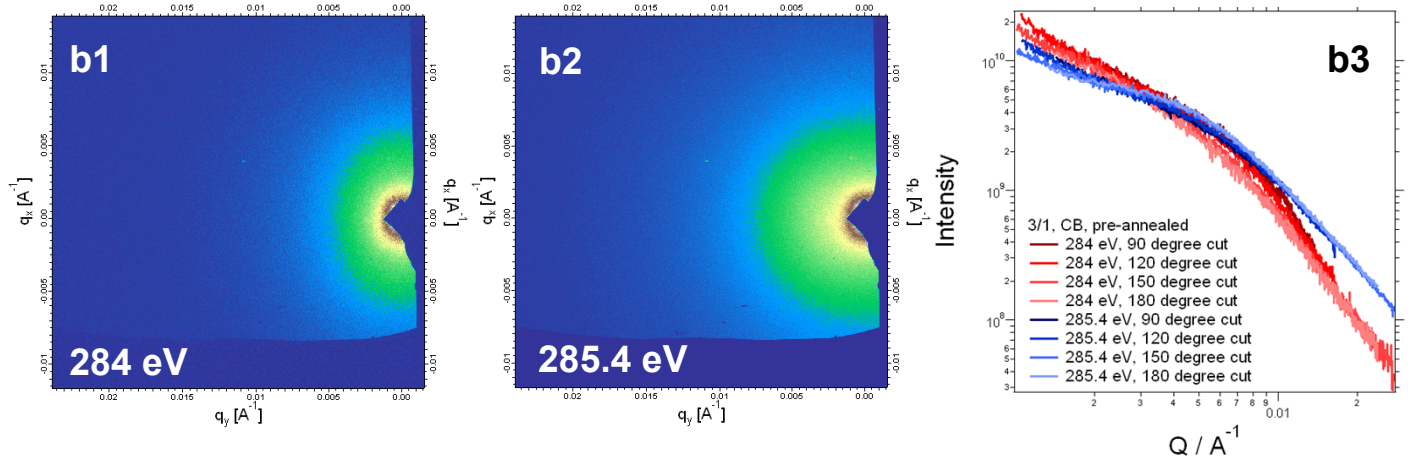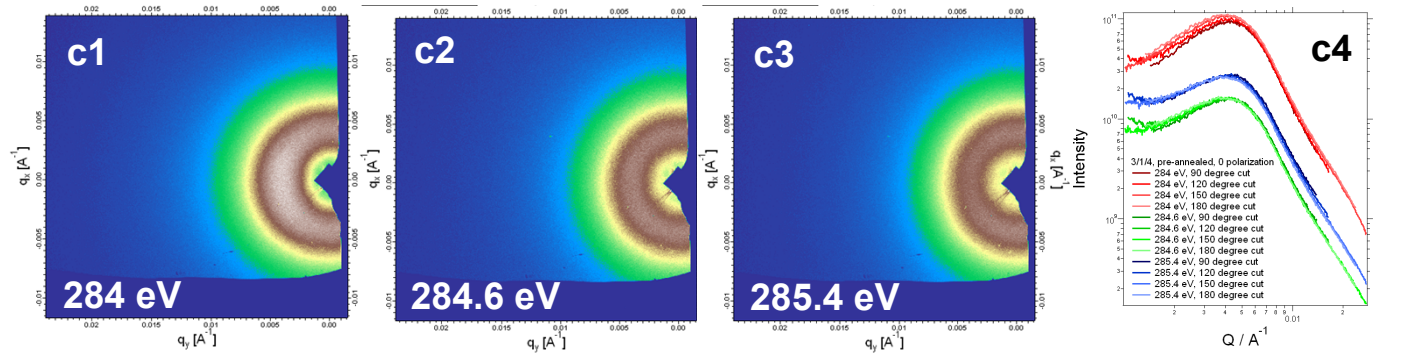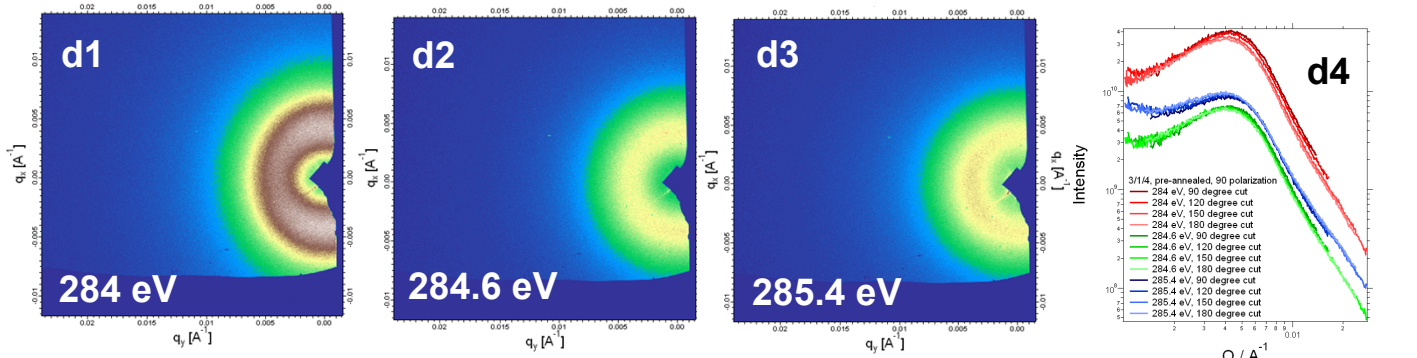

**Figure S4.** P-RSoXS scattering patterns and sector averaged profiles for P3HT-32k:PCPDTBT thin film (3/1 wt/wt, spin-coated by CB and pre-annealed) at horizontally polarized x-ray beam (a1-a3) or at vertically polarized x-ray beam (b1-b3). P-RSoXS scattering patterns and sector averaged profiles for P3HT-32k:PCPDTBT:PC<sub>61</sub>BM thin film (3/1/4, spin-coated by CB and pre-annealed) at horizontally polarized x-ray beam (c1-c4) or at vertically polarized x-ray beam (d1-d4).

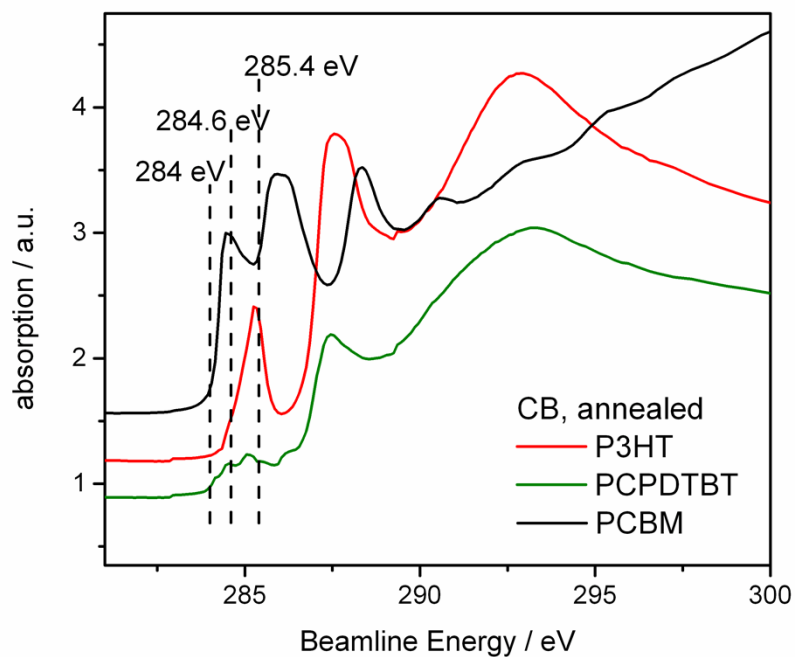

**Figure S5.** NEXAFS profiles for P3HT, PCPDTBT and PCBM spin-coated by CB and annealed.

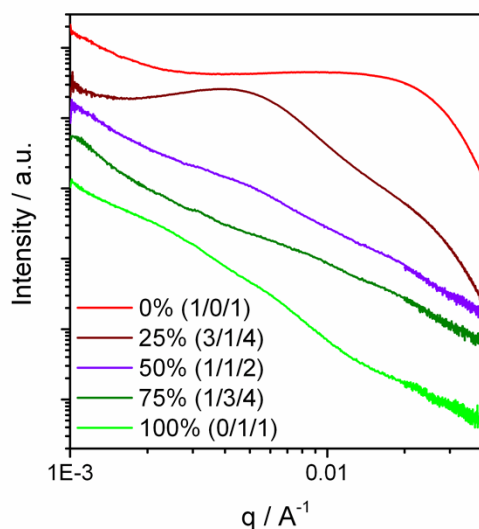

**Figure S6.** Circularly averaged P-RSoXS profiles for ternary blend thin film of P3HT-32k : PCPDTBT:PC<sub>61</sub>BM or binary references at 284 eV horizontally polarized x-ray beam. The

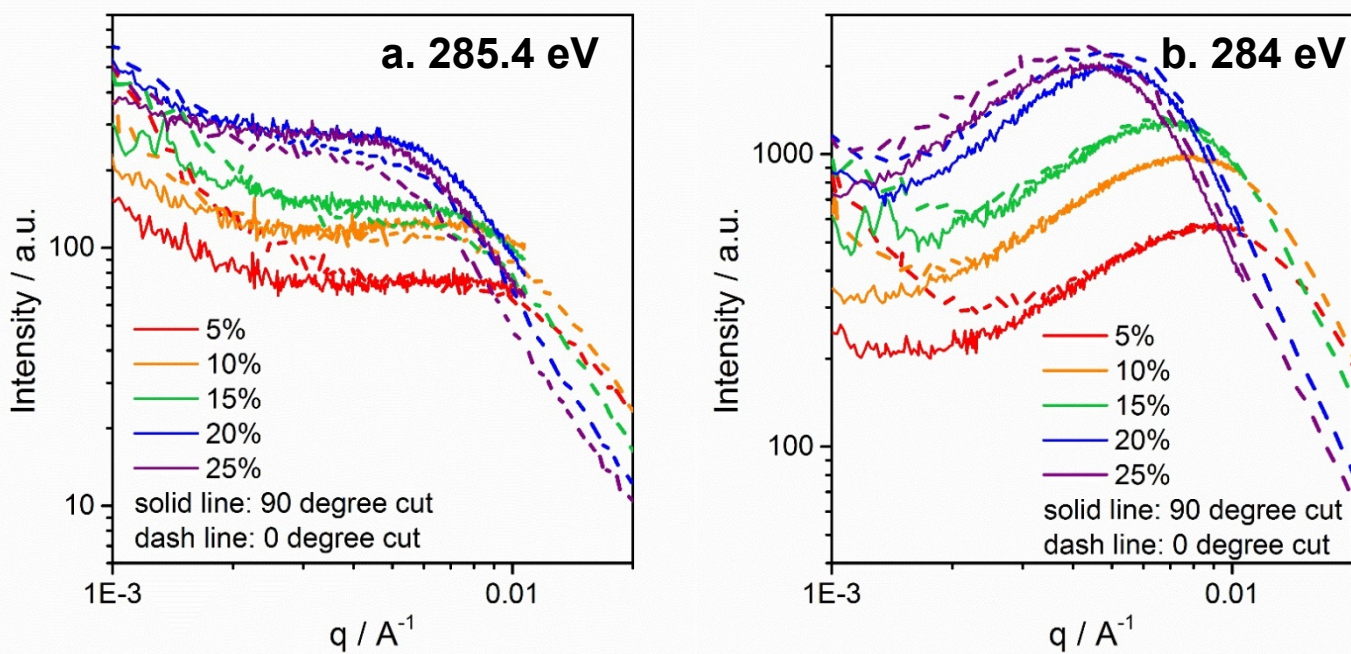

profiles are shifted to show each curve clearly.

**Figure S7.** Sector averaged ( $\pm 2^\circ$ ) P-RSoXS profiles for ternary blend thin film of P3HT-32k : PCPDTBT:PC<sub>61</sub>BM with different PCPDTBT weight fractions at (a) 285.4 eV or (b) 284 eV horizontally polarized x-ray beam.

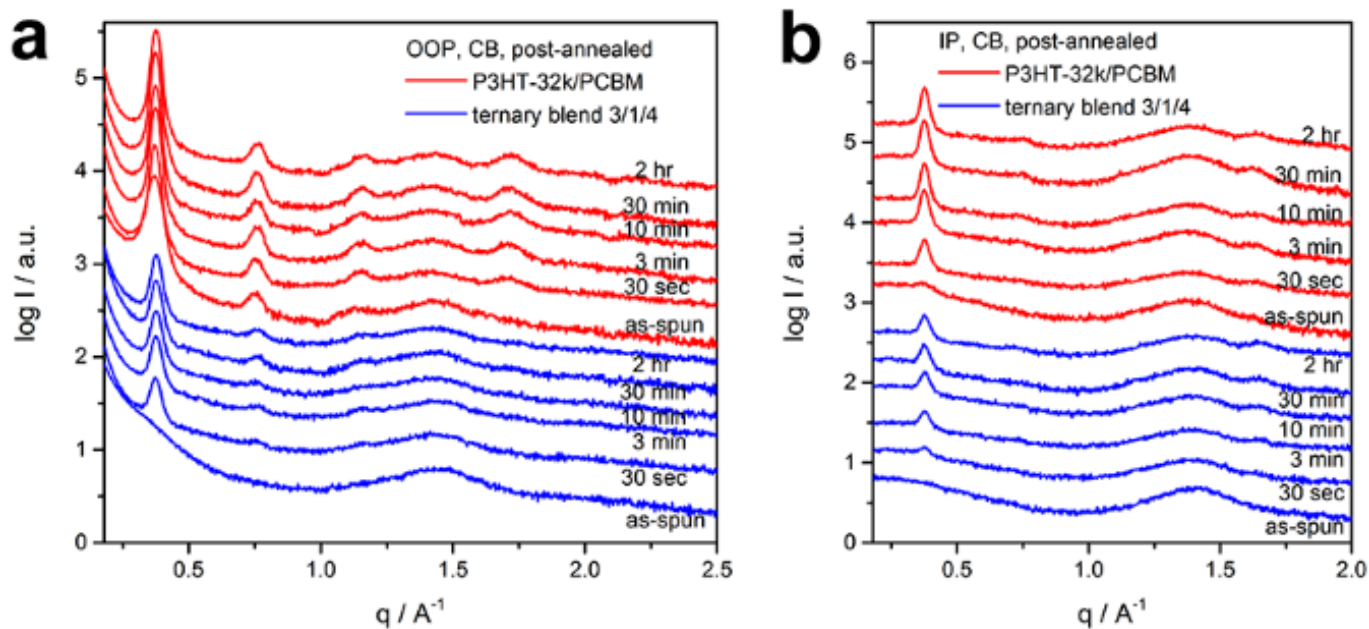

**Figure S8.** GIXD OOP (a) or IP (b) profiles for thin film of P3HT-32k:PCBM (1/1) and P3HT-32k:PCPDTBT:PC<sub>61</sub>BM (3/1/4) spin-coated by CB and post-annealed for a different time.

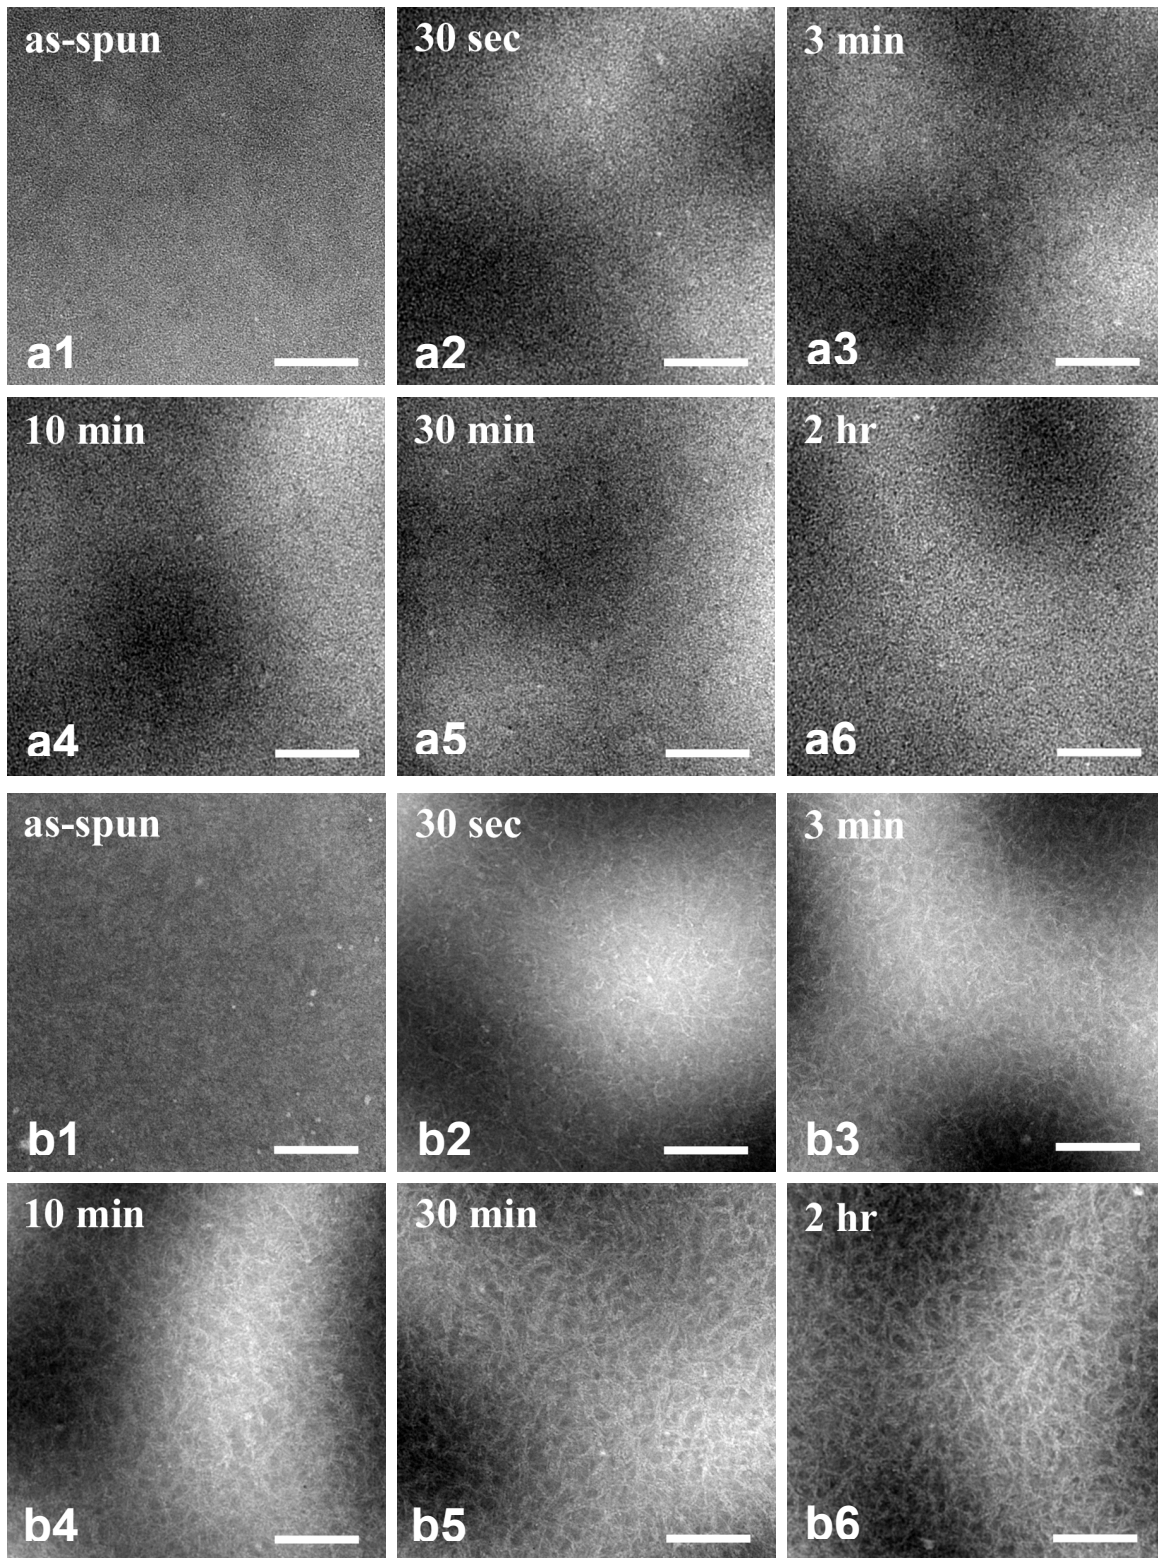

**Figure S9.** BF-TEM images for thin films of P3HT-32k:PC<sub>61</sub>BM (1/1) (a1-a6) or P3HT-32k:PCPDTBT:PC<sub>61</sub>BM (3/1/4) (b1-b6) post-annealed for a different time. The scale bar is 500 nm.

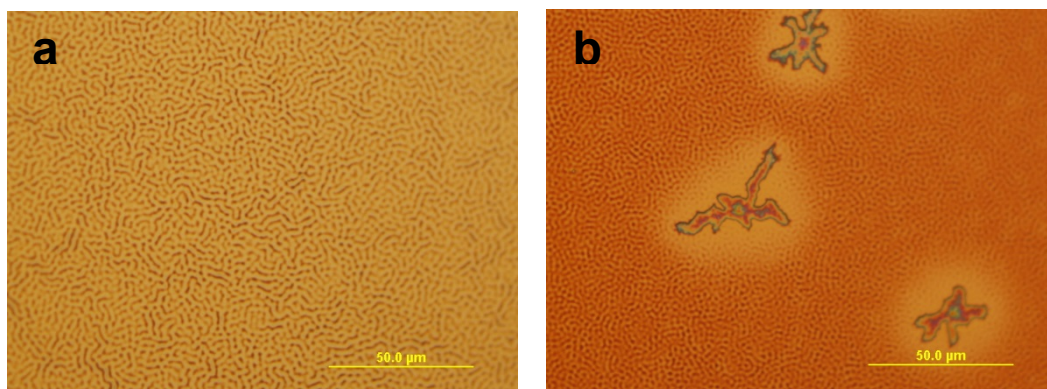

**Figure S10.** OM images for thin film of P3HT-32k:PCPDTBT:PC<sub>61</sub>BM (3/1/4) (a) and P3HT-32k:PC<sub>61</sub>BM (1/1) (b) spin-coated by CB and post-annealed for 2 hours. The worm-like structures on the surface are the wrinkles existing in the post-annealed samples.



**Table S1.** Device performance as a function of annealing time for thin films of P3HT-32k : PC<sub>61</sub>BM (1/1), P3HT-32k:PCPDTBT:PC<sub>61</sub>BM (3/1/4) and PCPDTBT:PC<sub>61</sub>BM (1/1) spin-coated by CB and post-annealed.

|                                                      |             | V <sub>oc</sub> (V) | J <sub>sc</sub> (mA/cm <sup>2</sup> ) | Fill Factor (%) | Efficiency (%) |
|------------------------------------------------------|-------------|---------------------|---------------------------------------|-----------------|----------------|
| P3HT-32k:<br>PC <sub>61</sub> BM (1:1)               | as-spun     | 0.64±0.01           | 0.71±0.07                             | 30±1            | 0.14±0.01      |
|                                                      | post-30 s   | 0.58±0.001          | 6.25±0.08                             | 55±2            | 1.99±0.04      |
|                                                      | post-3 min  | 0.58±0.002          | 6.02±0.27                             | 63±1            | 2.18±0.11      |
|                                                      | post-10 min | 0.58±0.005          | 6.47±0.11                             | 63±2            | 2.35±0.05      |
|                                                      | post-30 min | 0.58±0.005          | 6.80±0.05                             | 63±1            | 2.50±0.04      |
|                                                      | post-2 h    | 0.58±0.002          | 6.48±0.11                             | 62±1            | 2.30±0.02      |
| P3HT-32k:<br>PCPDTBT:<br>PC <sub>61</sub> BM (3:1:4) | as-spun     | 0.54±0.01           | 1.54±0.10                             | 35±1            | 0.29±0.02      |
|                                                      | post-30 s   | 0.63±0.001          | 5.29±0.16                             | 51±1            | 1.72±0.06      |
|                                                      | post-3 min  | 0.61±0.001          | 7.06±0.27                             | 48±1            | 2.06±0.10      |
|                                                      | post-10 min | 0.60±0.01           | 7.35±0.38                             | 49±1            | 2.16±0.13      |
|                                                      | post-30 min | 0.60±0.004          | 7.48±0.31                             | 47±1            | 2.13±0.06      |
|                                                      | post-2 h    | 0.60±0.001          | 7.86±0.31                             | 50±1            | 2.38±0.09      |
| PCPDTBT:<br>PC <sub>61</sub> BM (1:1)                | as-spun     | 0.49±0.01           | 5.03±0.09                             | 38±1            | 0.92±0.03      |
|                                                      | post-30 s   | 0.58±0.02           | 5.11±0.14                             | 35±1            | 1.04±0.04      |
|                                                      | post-3 min  | 0.66±0.001          | 5.16±0.19                             | 36±1            | 1.24±0.07      |
|                                                      | post-10 min | 0.66±0.005          | 5.37±0.18                             | 36±1            | 1.28±0.05      |
|                                                      | post-30 min | 0.65±0.005          | 5.28±0.28                             | 36±1            | 1.23±0.09      |
|                                                      | post-2 h    | 0.64±0.005          | 5.35±0.19                             | 36±1            | 1.24±0.05      |

**Table S2.** Device performance for the ternary blend solar cells using P3HT-28k or P3HT-19k and their binary references spin-coated by CB and post-annealed for 10 minutes.

| batch of P3HT | blending ratio of P3HT:PCPDTBT:PC <sub>61</sub> BM | V <sub>oc</sub> (V) | J <sub>sc</sub> (mA/cm <sup>2</sup> ) | Fill Factor (%) | Efficiency (%) |
|---------------|----------------------------------------------------|---------------------|---------------------------------------|-----------------|----------------|
| P3HT-28k      | 1:0:1                                              | 0.55±0.004          | 6.84±0.16                             | 64±2            | 2.39±0.02      |
|               | 3:1:4                                              | 0.59±0.007          | 9.51±0.22                             | 54±1            | 3.04±0.02      |
| P3HT-19k      | 1:0:1                                              | 0.61±0.005          | 6.73±0.28                             | 57±2            | 2.34±0.05      |
|               | 3:1:4                                              | 0.65±0.008          | 2.95±0.42                             | 45±2            | 0.86±0.16      |

**Table S3.** Device performance for the ternary blend solar cells using P3HT-32k with different blending ratios and binary references spin-coated by CB and post-annealed for 10 minutes.

|                                              | V <sub>oc</sub> (V) | J <sub>sc</sub> (mA/cm <sup>2</sup> ) | Fill Factor (%) | Efficiency (%) |
|----------------------------------------------|---------------------|---------------------------------------|-----------------|----------------|
| PCPDTBT:PC <sub>61</sub> BM (1:1)            | 0.66±0.005          | 5.37±0.18                             | 36±1            | 1.28±0.05      |
| P3HT-32k:PCPDTBT:PC <sub>61</sub> BM (1:3:4) | 0.64±0.005          | 4.68±0.20                             | 37±1            | 1.10±0.05      |
| P3HT-32k:PCPDTBT:PC <sub>61</sub> BM (2:2:4) | 0.64±0.01           | 4.36±0.19                             | 37±1            | 1.04±0.06      |
| P3HT-32k:PCPDTBT:PC <sub>61</sub> BM (3:1:4) | 0.60±0.01           | 7.35±0.38                             | 49±1            | 2.16±0.13      |
| P3HT-32k:PC <sub>61</sub> BM (1:1)           | 0.58±0.005          | 6.47±0.11                             | 63±2            | 2.35±0.05      |
